# Supplementary material for: Impact of sarcopenia on intertrochanteric femoral fracture in the elderly
Source: PeerJ. 2022 Jun 15;10:e13445. doi: 10.7717/peerj.13445 (PMC9206433; doi:10.7717/peerj.13445)
Supplement: Supplemental Information 2 [file peerj-10-13445-s002.xls]

## Sheet: Sheet1
ID_BASDAT	Sarcopenia	Death	INTERVENTION	AGE	SEX	illiteracy	CIVIL_STATUS	Coexistence	Coexistence_basal	INCOME	HOSPITAL_STAY	intervention_complications	hypertension	MELLITUS_Diabetes	Dyslipidemia	OSTEOPOROSIS	Previous_hip_fracture_history	Psychotropics	Bisphosphonates	Sensory_disturbances	ASA	depressive_mood_history	depressive_mood	BMI	BARTHEL_INDEX_1Month	BARTHEL_INDEX_6Month	BA6	BARTHEL_INDEX_1year	BA12	LYBRODY1Month1	LYBRODY1Month2	LYBRODY1Month3	LYBRODY1Month4	LYBRODY1Month5	LYBRODY1Month6	LYBRODY1Month7	LYBRODY1Month8	1month	LYBRODY6Month1	LYBRODY6Month2	LYBRODY6Month3	LYBRODY6Month4	LYBRODY6Month5	LYBRODY6Month6	LYBRODY6Month7	LYBRODY6Month8	6month	DS6	LYBRODY1year1
178	Yes	1	NO	66	Female	YES	Married	nursing_home	Institutionalized	<500	13	No	Yes	Yes	Yes	No	Yes	Yes	No	Yes	III	NO	YES	21.51
17	Yes	1	NO	92	Man	NO	Married	live_as_a_couple	No_institutionalized	500-1000	8	Yes	Yes	No	No	No	Yes	Yes	No	Yes	IV	YES	NO	25.41
67	No	1	NO	82	Female	NO	Single	live_alone	No_institutionalized	500-1000	7	No	Yes	No	No	No	No	No	No	No	IV	NO	YES	34.05
72	No	1	NO	92	Man	NO	Single	live_with_relatives	No_institutionalized	500-1000	11	No	Yes	No	No	No	No	Yes	No	Yes	III	NO	YES	33.91
181	Yes	1	YES	87	Female	YES	Single	live_with_relatives	No_institutionalized	500-1000	9	No	Yes	No	No	No	Yes	No	No	No	III	NO	YES	29.14
13	Yes	1	YES	80	Female	YES	Single	nursing_home	Institutionalized	500-1000	12	No	Yes	Yes	Yes	No	No	No	No	Yes	III	YES	YES	23.92
158	Yes	1	NO	84	Female	YES	Single	live_with_relatives	No_institutionalized	500-1000	7	No	Yes	No	No	No	Yes	No	No	Yes	III	NO	YES	24.26
70	No	1	NO	89	Man	NO	Single	live_with_relatives	No_institutionalized	500-1000	7	No	Yes	No	No	No	No	No	No	Yes	II	NO	NO	29.38
12	Yes	1	YES	99	Female	NO	Single	live_with_relatives	No_institutionalized	500-1000	10	No	Yes	No	No	No	No	No	No	No	II	NO	NO	26.34
42	No	1	NO	85	Female	NO	Married	nursing_home	Institutionalized	500-1000	8	No	Yes	No	No	No	No	Yes	No	No	III	YES	NO	28.52
2	Yes	1	YES	93	Man	NO	Married	live_as_a_couple	No_institutionalized	500-1000	11	No	No	No	No	No	No	No	No	Yes	II	NO	NO	28.84
21	No	1	NO	92	Female	YES	Single	nursing_home	Institutionalized	500-1000	6	Yes	Yes	No	No	No	No	Yes	No	Yes	II	YES	NO	27.1
79	Yes	1	NO	92	Man	NO	Single	nursing_home	Institutionalized	500-1000	9	No	No	No	No	No	No	No	No	No	II	NO	NO	26.81
44	Yes	1	NO	94	Man	YES	Single	nursing_home	Institutionalized	<500	23	Yes	No	No	No	No	No	No	No	No	II	NO	NO	21.71
149	No	1	YES	81	Man	YES	Single	live_with_relatives	No_institutionalized	500-1000	8	No	No	No	Yes	No	No	No	No	Yes	IV	NO	YES	24.44
31	Yes	1	NO	70	Female	NO	Married	live_as_a_couple	No_institutionalized	500-1000	10	Yes	Yes	Yes	No	No	No	No	No	Yes	III	YES	NO	24.09
124	No	1	NO	87	Man	NO	Single	live_alone	No_institutionalized	1000-1500	9	No	Yes	No	No	No	No	No	No	No	III	NO	YES	23.77
35	No	1	NO	80	Female	YES	Married	live_as_a_couple	No_institutionalized	1000-1500	13	No	Yes	No	No	No	No	No	No	Yes	II	NO	NO	23.11
10	No	1	YES	92	Female	NO	Single	nursing_home	Institutionalized	500-1000	9	No	No	No	No	No	No	No	No	Yes	III	YES	YES	22.22
200	No	0	YES	83	Female	YES	Married	live_as_a_couple	No_institutionalized	500-1000	4	No	Yes	No	Yes	No	No	Yes	No	No	II	NO	YES	28.89	60	65	5	70	10	1	0	0	0	0	0	0	0	1	1	0	0	0	0	0	0	0	1	0	1
127	No	0	NO	83	Female	YES	Married	live_as_a_couple	No_institutionalized	1000-1500	6	No	Yes	Yes	Yes	No	No	Yes	No	Yes	III	NO	YES	35.26	60	70	10	70	10	1	0	0	0	1	0	1	0	3	1	0	0	0	1	0	1	0	3	0	1
187	No	0	YES	72	Female	YES	Married	live_as_a_couple	No_institutionalized	500-1000	5	No	Yes	Yes	No	No	No	No	No	No	II	NO	YES	38.28	50	60	10	60	10	1	0	0	0	0	0	1	0	2	1	0	0	0	0	0	1	1	3	1	1
164	No	0	YES	88	Female	YES	Single	nursing_home	Institutionalized	500-1000	5	No	Yes	Yes	No	No	NO	Yes	No	No	III	NO	NO	36.63	65	60	-5	60	-5	1	0	0	0	0	0	0	1	2	1	0	0	0	0	0	0	1	2	0	1
173	No	0	YES	76	Female	YES	Single	live_with_relatives	No_institutionalized	500-1000	18	No	Yes	Yes	No	No	No	Yes	No	Yes	IV	YES	YES	34.6	15	15	0	20	5	1	0	0	0	0	0	0	0	1	1	0	0	0	0	0	0	0	1	0	1
50	No	0	NO	83	Man	NO	Single	live_alone	No_institutionalized	1000-1500	7	No	No	No	No	No	No	No	No	Yes	II	NO	NO	34.05	65	90	25	90	25	1	0	0	0	0	0	0	1	2	1	0	0	0	0	1	1	1	4	2	1
55	No	0	NO	92	Man	NO	Married	nursing_home	Institutionalized	500-1000	12	No	No	No	No	No	No	Yes	No	No	II	YES	YES	33.91	35	25	-10	30	-5	1	0	0	0	0	0	0	0	1	0	0	0	0	0	0	0	0	0	-1	0
171	Yes	0	NO	88	Female	NO	Single	live_alone	No_institutionalized	500-1000	3	No	Yes	No	Yes	No	Yes	Yes	No	Yes	III	NO	YES	29.3	55	70	15	75	20	1	0	0	0	0	0	1	0	2	1	0	0	0	0	0	1	1	3	1	1
111	No	0	YES	92	Female	YES	Single	live_with_relatives	No_institutionalized	500-1000	10	No	No	No	Yes	No	No	No	No	No	II	NO	NO	32.05	50	55	5	55	5	1	0	0	0	0	0	1	1	3	1	0	0	0	0	0	1	1	3	0	1
172	No	0	YES	82	Female	YES	Single	nursing_home	Institutionalized	500-1000	8	No	No	No	No	No	No	Yes	No	Yes	IV	NO	NO	32.05	45	50	5	50	5	0	0	0	0	0	0	0	0	0	0	0	0	0	0	0	0	0	0	0	0
208	No	0	YES	82	Female	YES	Married	live_as_a_couple	No_institutionalized	500-1000	6	No	Yes	Yes	Yes	No	No	Yes	No	Yes	III	NO	NO	31.25	50	70	20	70	20	1	0	0	0	0	0	0	1	2	1	0	0	0	0	0	1	1	3	1	1
9	No	0	YES	80	Man	NO	Married	live_as_a_couple	No_institutionalized	500-1000	14	Yes	Yes	No	Yes	No	No	No	No	Yes	II	NO	NO	31.23	45	40	-5	40	-5	1	0	0	0	0	0	0	0	1	1	0	0	0	0	0	0	0	1	0	1
80	Yes	0	NO	88	Female	NO	Married	live_as_a_couple	No_institutionalized	500-1000	10	No	Yes	Yes	No	No	Yes	No	No	No	II	NO	YES	25.97	60	65	5	65	5	1	0	0	0	0	0	0	0	1	1	0	0	0	0	0	0	0	1	0	1
94	No	0	YES	79	Man	NO	Single	live_alone	No_institutionalized	500-1000	13	Yes	Yes	No	No	No	No	Yes	No	No	III	YES	YES	31.14	80	100	20	90	10	1	0	0	0	0	0	1	1	3	1	0	0	0	0	0	1	0	2	-1	1
203	No	0	YES	86	Female	YES	Single	live_alone	No_institutionalized	500-1000	9	No	Yes	Yes	No	No	No	Yes	No	Yes	III	NO	NO	30.48	35	40	5	40	5	1	0	0	0	1	0	0	1	3	1	0	0	0	0	0	1	0	2	-1	1
184	No	0	YES	83	Female	NO	Single	live_alone	No_institutionalized	500-1000	5	No	Yes	Yes	No	No	No	Yes	No	Yes	III	NO	NO	30.44	55	75	20	70	15	1	0	0	0	0	0	0	1	2	1	0	0	0	0	0	1	1	3	1	1
123	No	0	YES	83	Man	NO	Married	live_as_a_couple	No_institutionalized	>=1500	8	No	Yes	Yes	Yes	No	No	No	No	Yes	III	NO	NO	30.43	70	60	-10	60	-10	1	0	0	0	0	0	1	1	3	1	0	0	0	0	0	1	0	2	-1	1
132	No	0	YES	87	Man	YES	Single	live_with_relatives	No_institutionalized	500-1000	11	No	Yes	No	No	No	No	No	No	Yes	IV	NO	NO	30.12	65	60	-5	65	0	1	0	0	0	0	0	1	0	2	1	0	0	0	0	0	1	1	3	1	1
185	No	0	YES	83	Female	NO	Married	live_as_a_couple	No_institutionalized	500-1000	6	No	Yes	No	No	No	No	Yes	No	No	III	YES	YES	30.04	50	60	10	65	15	1	0	0	0	0	0	0	1	2	1	0	0	0	0	0	0	1	2	0	1
191	Yes	0	NO	82	Female	YES	Married	nursing_home	Institutionalized	1000-1500	5	No	Yes	No	No	No	No	No	No	No	II	NO	NO	20.02	15	15	0	15	0	0	0	0	0	0	0	0	0	0	0	0	0	0	0	0	0	0	0	0	0
140	No	0	YES	81	Female	NO	Married	live_as_a_couple	No_institutionalized	1000-1500	5	Yes	Yes	Yes	Yes	No	No	Yes	No	No	III	NO	NO	29.67	65	65	0	65	0	1	0	0	0	0	0	1	1	3	1	0	0	0	0	0	1	1	3	0	1
176	Yes	0	NO	86	Female	YES	Single	live_alone	No_institutionalized	500-1000	6	No	Yes	No	No	No	No	No	No	No	II	NO	YES	23.33	50	55	5	50	0	1	0	0	0	0	0	1	1	3	1	0	0	0	0	0	1	1	3	0	1
18	Yes	0	NO	77	Man	NO	Married	live_as_a_couple	No_institutionalized	1000-1500	14	No	No	No	Yes	No	No	No	No	No	III	YES	NO	22.42	45	90	45	75	30	1	0	0	0	0	0	0	0	1	1	0	0	0	0	1	0	1	3	2	1
182	Yes	0	YES	85	Man	NO	Single	live_alone	No_institutionalized	1000-1500	8	No	No	No	No	No	No	No	No	Yes	III	NO	YES	31.22	40	45	5	45	5	1	0	0	0	0	0	0	1	2	1	0	0	0	0	0	0	0	1	-1	1
27	Yes	0	NO	85	Man	NO	Married	nursing_home	Institutionalized	500-1000	12	Yes	No	No	No	No	No	Yes	No	Yes	III	NO	YES	20.22	40	45	5	35	-5	0	0	0	0	0	0	0	0	0	0	0	0	0	0	0	0	0	0	0	0
5	No	0	YES	73	Female	NO	Married	live_as_a_couple	No_institutionalized	500-1000	12	No	Yes	No	Yes	No	No	No	No	No	III	YES	YES	28.76	85	65	-20	95	10	1	0	1	1	1	1	1	1	7	1	0	1	1	1	0	1	1	6	-1	1
204	No	0	YES	87	Female	NO	Single	live_alone	No_institutionalized	500-1000	8	No	Yes	No	No	No	No	Yes	No	No	III	NO	YES	28.76	45	50	5	50	5	1	0	0	0	0	0	0	0	1	1	0	0	0	0	0	0	0	1	0	1
218	No	0	YES	80	Man	NO	Married	live_as_a_couple	No_institutionalized	500-1000	5	No	Yes	Yes	Yes	No	No	No	Yes	Yes	III	NO	NO	28.65	55	65	10	65	10	1	0	0	0	0	0	0	0	1	1	0	0	0	0	0	0	1	2	1	1
3	No	0	YES	73	Female	NO	Married	live_as_a_couple	No_institutionalized	500-1000	6	No	Yes	Yes	Yes	No	No	No	No	Yes	III	YES	NO	28.58	55	75	20	95	40	1	0	0	0	1	1	1	0	4	1	0	0	1	0	0	0	0	2	-2	1
206	No	0	YES	89	Female	YES	Single	nursing_home	Institutionalized	500-1000	7	No	Yes	Yes	No	No	NO	Yes	No	No	III	NO	YES	28.58	50	55	5	55	5	1	0	0	0	0	0	0	0	1	1	0	0	0	0	0	0	0	1	0	1
46	No	0	NO	87	Female	NO	Married	live_as_a_couple	No_institutionalized	500-1000	6	No	Yes	No	No	No	No	No	No	Yes	II	NO	NO	28.44	45	35	-10	35	-10	1	0	0	0	0	0	0	0	1	1	0	0	0	0	0	1	0	2	1	1
68	No	0	NO	92	Female	NO	Single	nursing_home	Institutionalized	500-1000	3	No	Yes	Yes	No	No	No	Yes	No	Yes	III	NO	NO	28.3	45	45	0	45	0	0	0	0	0	0	0	0	0	0	0	0	0	0	0	0	0	0	0	0	0
150	No	0	NO	69	Female	NO	Married	live_as_a_couple	No_institutionalized	500-1000	6	No	No	No	No	No	No	No	No	Yes	III	NO	YES	28.04	60	60	0	55	-5	1	0	0	0	0	0	1	1	3	1	0	0	0	0	0	1	1	3	0	1
90	No	0	NO	95	Female	NO	Single	live_with_relatives	No_institutionalized	500-1000	11	No	Yes	Yes	No	Yes	No	Yes	No	Yes	III	NO	YES	28.04	40	45	5	50	10	1	0	0	0	0	0	1	0	2	0	0	0	0	0	0	0	0	0	-2	0
141	Yes	0	NO	81	Female	YES	Single	nursing_home	Institutionalized	500-1000	7	No	Yes	No	Yes	No	No	Yes	No	No	III	NO	YES	29.78	60	85	25	80	20	1	0	0	0	0	0	1	0	2	1	0	0	0	0	0	1	0	2	0	1
117	No	0	YES	82	Female	YES	Married	live_as_a_couple	No_institutionalized	1000-1500	4	No	Yes	No	Yes	No	NO	Yes	No	No	II	NO	YES	27.89	50	60	10	65	15	1	0	0	0	0	0	1	1	3	1	0	0	0	0	0	0	0	1	-2	1
108	Yes	0	YES	87	Female	NO	Single	live_alone	No_institutionalized	500-1000	10	No	Yes	No	No	No	No	Yes	No	Yes	IV	NO	NO	24.59	50	50	0	40	-10	1	0	0	0	0	0	1	0	2	1	0	0	0	0	0	1	0	2	0	1
48	No	0	NO	82	Female	NO	Married	live_as_a_couple	No_institutionalized	500-1000	5	No	Yes	Yes	No	Yes	No	Yes	No	Yes	III	NO	YES	27.68	45	35	-10	35	-10	1	0	0	0	0	0	0	0	1	0	0	0	0	0	0	0	0	0	-1	0
113	No	0	YES	81	Female	YES	Married	live_as_a_couple	No_institutionalized	500-1000	13	Yes	Yes	Yes	No	No	No	Yes	No	Yes	III	YES	YES	27.56	60	60	0	60	0	1	0	0	0	1	0	1	0	3	1	0	0	0	0	0	0	0	1	-2	1
102	No	0	YES	83	Female	NO	Single	live_with_relatives	No_institutionalized	500-1000	4	No	No	No	No	No	No	No	No	Yes	III	YES	YES	27.56	80	65	-15	65	-15	1	0	0	0	1	0	1	0	3	1	0	1	1	1	0	1	1	6	3	1
195	Yes	0	NO	79	Man	YES	Married	live_as_a_couple	No_institutionalized	<500	5	No	Yes	No	No	No	No	No	No	Yes	III	NO	NO	27.78	15	30	15	30	15	1	0	0	0	0	0	0	0	1	1	0	0	0	0	0	0	1	2	1	1
91	No	0	NO	82	Man	NO	Married	live_as_a_couple	No_institutionalized	500-1000	7	No	No	No	No	No	No	No	No	No	III	NO	NO	27.55	55	60	5	60	5	1	0	0	0	0	0	1	1	3	1	0	0	0	0	0	1	0	2	-1	1
86	No	0	NO	81	Female	NO	Single	live_with_relatives	No_institutionalized	500-1000	9	Yes	Yes	No	Yes	No	No	No	No	No	III	NO	YES	27.55	45	40	-5	40	-5	1	0	0	0	0	0	0	0	1	0	0	0	0	0	0	0	0	0	-1	0
32	No	0	NO	74	Man	NO	Single	live_alone	No_institutionalized	500-1000	8	Yes	Yes	No	No	No	No	No	No	No	II	NO	NO	27.41	55	90	35	100	45	1	0	0	0	0	0	1	1	3	1	0	0	0	0	0	1	1	3	0	1
87	No	0	NO	91	Female	NO	Single	live_with_relatives	No_institutionalized	500-1000	13	No	Yes	No	Yes	No	No	No	No	Yes	III	NO	YES	27.34	55	60	5	60	5	1	0	0	0	1	0	1	0	3	1	0	0	0	0	0	0	0	1	-2	1
138	No	0	YES	83	Female	NO	Married	live_as_a_couple	No_institutionalized	500-1000	18	No	Yes	Yes	Yes	No	No	No	No	Yes	III	NO	YES	27.34	55	60	5	60	5	1	0	0	0	0	0	1	1	3	1	0	0	0	1	0	1	1	4	1	1
196	No	0	YES	84	Female	YES	Single	live_alone	No_institutionalized	500-1000	4	No	No	No	No	No	No	Yes	No	No	III	NO	YES	26.95	55	90	35	90	35	1	0	0	0	0	0	1	1	3	1	0	0	1	1	1	1	1	6	3	1
33	No	0	NO	92	Female	YES	Single	nursing_home	Institutionalized	500-1000	7	No	Yes	Yes	No	No	No	Yes	No	No	III	NO	YES	26.95	40	40	0	40	0	1	0	0	0	0	0	0	0	1	1	0	0	0	0	0	0	0	1	0	1
24	No	0	NO	85	Man	NO	Single	nursing_home	Institutionalized	500-1000	6	Yes	No	No	No	No	No	No	No	No	II	NO	YES	26.93	25	20	-5	20	-5	0	0	0	0	0	0	0	0	0	0	0	0	0	0	0	0	0	0	0	0
216	No	0	NO	91	Female	NO	Single	live_with_relatives	No_institutionalized	500-1000	6	No	No	Yes	Yes	No	No	No	No	Yes	III	NO	YES	26.84	55	55	0	55	0	1	0	0	0	0	0	1	0	2	1	0	0	0	0	0	1	0	2	0	1
188	Yes	0	YES	90	Female	YES	Single	live_with_relatives	No_institutionalized	500-1000	6	No	Yes	No	No	No	No	Yes	No	No	III	YES	YES	22.73	40	40	0	40	0	1	0	0	0	0	0	0	0	1	1	0	0	0	0	0	0	0	1	0	1
167	No	0	NO	81	Female	YES	Single	nursing_home	Institutionalized	500-1000	7	No	Yes	No	No	No	No	No	No	No	II	YES	YES	26.71	55	50	-5	50	-5	1	0	0	0	0	0	0	1	2	1	0	0	0	0	0	0	1	2	0	1
29	No	0	NO	94	Female	NO	Single	live_with_relatives	No_institutionalized	500-1000	9	No	Yes	No	No	No	No	No	No	Yes	III	YES	NO	26.67	50	60	10	85	35	1	0	0	0	0	0	0	0	1	1	0	0	0	0	0	0	0	1	0	1
153	Yes	0	NO	82	Female	NO	Single	live_with_relatives	No_institutionalized	500-1000	7	No	Yes	No	No	No	No	No	No	No	III	NO	NO	23.56	50	55	5	60	10	1	0	0	0	0	0	1	0	2	1	0	0	0	0	0	1	0	2	0	1
75	No	0	NO	92	Female	NO	Single	live_with_relatives	No_institutionalized	500-1000	8	No	Yes	Yes	Yes	No	No	Yes	No	No	III	NO	YES	26.67	30	50	20	55	25	0	0	0	0	0	0	0	0	0	1	0	0	0	0	0	0	0	1	1	1
89	No	0	NO	93	Female	YES	Single	live_alone	No_institutionalized	500-1000	9	Yes	Yes	Yes	Yes	No	No	Yes	No	No	III	YES	YES	26.56	45	55	10	55	10	1	0	0	0	0	0	0	0	1	0	0	0	0	0	0	0	0	0	-1	0
130	No	0	YES	79	Female	NO	Single	live_with_relatives	No_institutionalized	500-1000	7	No	No	No	No	No	No	No	No	Yes	II	NO	NO	26.48	60	65	5	65	5	1	0	0	0	0	0	1	1	3	1	0	0	0	0	0	1	0	2	-1	1
155	No	0	YES	74	Female	YES	Married	live_as_a_couple	No_institutionalized	500-1000	6	No	No	No	No	No	No	Yes	No	No	II	NO	NO	26.45	70	70	0	65	-5	1	0	0	0	0	0	1	1	3	1	0	0	0	1	0	1	1	4	1	1
223	No	0	YES	84	Female	YES	Single	nursing_home	Institutionalized	500-1000	8	No	Yes	No	No	No	NO	No	No	Yes	IV	YES	YES	26.44	25	30	5	30	5	0	0	0	0	1	0	0	0	1	0	0	0	0	0	0	0	0	0	-1	0
4	No	0	YES	81	Female	NO	Married	live_as_a_couple	No_institutionalized	1000-1500	9	No	Yes	No	No	No	No	No	No	No	II	YES	YES	26.12	60	90	30	85	25	1	0	0	0	1	0	1	1	4	1	0	0	1	1	0	1	1	5	1	1
201	No	0	YES	83	Man	NO	Married	live_as_a_couple	No_institutionalized	<500	4	No	Yes	No	No	No	No	No	No	No	III	NO	NO	25.95	55	70	15	70	15	1	0	0	0	0	0	1	1	3	1	0	0	0	0	0	1	1	3	0	1
104	No	0	YES	80	Man	YES	Married	live_as_a_couple	No_institutionalized	1000-1500	6	No	Yes	Yes	No	No	No	Yes	No	No	III	NO	NO	25.86	70	65	-5	65	-5	1	0	0	0	0	0	1	1	3	1	0	0	0	0	0	1	1	3	0	1
58	No	0	NO	81	Female	NO	Married	live_as_a_couple	No_institutionalized	500-1000	9	No	Yes	No	No	No	No	No	No	No	II	NO	YES	25.71	90	90	0	85	-5	1	0	0	0	0	0	1	1	3	1	0	0	0	1	0	1	1	4	1	1
74	No	0	NO	85	Man	NO	Married	live_as_a_couple	No_institutionalized	1000-1500	6	No	Yes	No	No	No	No	No	No	Yes	III	NO	NO	25.71	70	85	15	85	15	1	0	0	0	0	0	1	1	3	1	0	0	0	0	1	1	1	4	1	1
205	No	0	YES	88	Man	YES	Single	live_with_relatives	No_institutionalized	500-1000	10	No	Yes	Yes	Yes	No	No	No	No	Yes	III	NO	NO	25.71	60	85	25	80	20	0	0	0	0	0	0	1	0	1	0	0	0	0	0	0	1	0	1	0	0
213	Yes	0	YES	83	Female	NO	Single	supervised_flat	Institutionalized	<500	7	No	Yes	No	Yes	No	No	Yes	No	Yes	III	NO	YES	22.67	25	30	5	30	5	1	0	0	0	0	0	0	0	1	0	0	0	0	0	0	0	0	0	-1	0
180	No	0	NO	86	Man	NO	Married	live_with_relatives	No_institutionalized	500-1000	11	No	Yes	No	No	No	No	Yes	No	Yes	III	YES	YES	25.47	25	40	15	40	15	0	0	0	0	0	0	0	1	1	0	0	0	0	0	0	0	1	1	0	0
7	No	0	YES	86	Female	NO	Single	live_alone	No_institutionalized	500-1000	6	No	Yes	Yes	No	No	No	Yes	No	Yes	III	NO	YES	25.39	10	40	30	50	40	1	0	0	0	0	0	0	0	1	0	0	0	0	0	0	0	0	0	-1	0
219	No	0	YES	95	Man	NO	Single	live_with_relatives	No_institutionalized	500-1000	11	No	Yes	No	No	No	NO	No	No	Yes	III	NO	YES	25.39	55	55	0	55	0	1	0	0	0	0	0	0	0	1	1	0	0	0	0	0	0	0	1	0	1
166	No	0	YES	90	Female	YES	Single	nursing_home	Institutionalized	500-1000	6	No	No	Yes	Yes	No	NO	Yes	No	No	III	NO	YES	25.33	40	45	5	40	0	1	0	0	0	0	0	0	1	2	1	0	0	0	0	0	0	1	2	0	1
221	No	0	YES	96	Man	NO	Single	live_with_relatives	No_institutionalized	500-1000	10	No	Yes	No	No	No	No	Yes	No	Yes	III	NO	YES	25.28	50	50	0	50	0	0	0	0	0	0	0	0	0	0	0	0	0	0	0	0	0	0	0	0	0
6	Yes	0	YES	84	Female	NO	Single	live_alone	No_institutionalized	1000-1500	6	No	No	No	No	No	No	Yes	No	No	II	NO	YES	25.51	60	50	-10	50	-10	1	0	0	0	0	0	0	0	1	1	0	0	0	0	0	0	1	2	1	1
215	No	0	YES	89	Man	NO	Single	live_with_relatives	No_institutionalized	500-1000	5	No	Yes	No	Yes	No	No	No	No	Yes	III	NO	YES	24.98	45	50	5	60	15	1	0	0	0	0	0	0	0	1	1	0	0	0	0	0	0	1	2	1	1
210	No	0	YES	83	Female	NO	Single	live_alone	No_institutionalized	500-1000	4	No	Yes	No	No	Yes	No	No	No	No	III	NO	YES	24.97	60	80	20	85	25	1	0	0	0	0	0	1	1	3	1	0	0	0	0	0	1	1	3	0	1
100	No	0	YES	83	Female	NO	Single	live_with_relatives	No_institutionalized	500-1000	3	No	No	Yes	No	No	No	No	No	Yes	II	NO	NO	24.97	65	90	25	80	15	1	0	0	0	0	0	1	1	3	1	0	0	1	1	1	1	1	6	3	1
183	No	0	YES	83	Female	NO	Single	live_with_relatives	No_institutionalized	500-1000	8	Yes	Yes	Yes	Yes	No	No	Yes	No	No	IV	NO	NO	24.89	55	60	5	55	0	1	0	0	0	0	0	0	1	2	1	0	0	0	0	0	0	1	2	0	1
212	No	0	NO	87	Female	NO	Single	live_with_relatives	No_institutionalized	500-1000	4	No	No	No	No	No	Yes	No	No	Yes	III	NO	YES	24.84	45	55	10	55	10	0	0	0	0	0	0	1	0	1	0	0	0	0	0	0	1	0	1	0	0
88	Yes	0	NO	84	Female	NO	Single	live_as_a_couple	No_institutionalized	500-1000	7	No	Yes	Yes	No	No	No	No	No	No	III	NO	YES	24.98	50	40	-10	40	-10	1	0	0	0	0	0	0	0	1	1	0	0	0	0	0	0	0	1	0	1
83	No	0	NO	83	Female	NO	Single	live_alone	No_institutionalized	500-1000	8	No	Yes	No	Yes	No	No	Yes	No	No	II	YES	YES	24.77	65	65	0	65	0	1	0	0	0	1	0	1	1	4	1	0	0	0	0	0	1	0	2	-2	1
189	Yes	0	NO	98	Female	YES	Single	live_with_relatives	No_institutionalized	500-1000	8	Yes	Yes	No	No	No	No	No	No	Yes	III	NO	YES	24.84	30	30	0	30	0	1	0	0	0	0	0	0	0	1	1	0	0	0	0	0	0	0	1	0	1
148	No	0	YES	83	Female	NO	Single	live_with_relatives	No_institutionalized	500-1000	7	No	Yes	Yes	Yes	No	No	No	No	No	III	NO	NO	24.67	60	65	5	70	10	1	0	0	0	0	0	1	1	3	1	0	0	0	1	0	1	1	4	1	1
84	No	0	NO	73	Female	YES	Married	live_as_a_couple	No_institutionalized	500-1000	6	No	Yes	Yes	Yes	No	No	No	No	Yes	III	NO	NO	24.65	60	65	5	65	5	1	0	0	0	0	0	0	0	1	1	0	0	0	0	0	1	0	2	1	1
71	No	0	NO	85	Female	YES	Single	live_with_relatives	No_institutionalized	500-1000	8	No	No	No	No	No	No	Yes	No	No	II	NO	NO	24.44	65	70	5	70	5	1	0	0	1	1	0	1	1	5	1	0	0	0	1	0	0	0	2	-3	1
112	Yes	0	YES	86	Female	NO	Single	live_with_relatives	No_institutionalized	500-1000	12	No	Yes	Yes	Yes	No	No	Yes	No	No	III	NO	NO	24.69	80	90	10	85	5	1	0	0	0	0	0	0	0	1	1	0	0	0	0	0	0	0	1	0	1
47	Yes	0	NO	91	Female	YES	Single	live_with_relatives	No_institutionalized	500-1000	9	No	Yes	Yes	No	No	No	Yes	No	Yes	III	YES	YES	24.44	45	45	0	40	-5	1	0	0	0	0	0	0	0	1	1	0	0	0	0	0	0	0	1	0	1
76	No	0	NO	84	Female	NO	Single	live_alone	No_institutionalized	500-1000	11	Yes	Yes	No	Yes	No	No	Yes	No	No	II	NO	YES	24.39	30	45	15	50	20	1	0	0	0	0	0	1	0	2	1	0	0	0	0	0	0	0	1	-1	1
133	No	0	YES	89	Female	NO	Single	nursing_home	Institutionalized	500-1000	10	No	Yes	Yes	No	No	No	No	No	Yes	III	NO	NO	24.34	75	80	5	80	5	1	0	0	0	0	0	1	1	3	1	0	0	0	0	0	1	1	3	0	1
54	Yes	0	NO	91	Female	NO	Single	nursing_home	Institutionalized	500-1000	7	No	No	No	No	Yes	No	Yes	No	No	II	NO	YES	24.44	30	30	0	30	0	0	0	0	0	0	0	0	0	0	0	0	0	0	0	0	0	0	0	0	0
82	No	0	NO	98	Female	NO	Single	live_alone	No_institutionalized	500-1000	8	No	No	No	No	Yes	No	No	Yes	No	II	NO	NO	24.24	70	65	-5	65	-5	1	0	0	0	0	0	1	1	3	1	0	0	0	0	0	0	0	1	-2	1
39	No	0	NO	71	Female	NO	Married	live_as_a_couple	No_institutionalized	500-1000	7	Yes	Yes	Yes	Yes	Yes	No	Yes	No	Yes	II	YES	YES	24.14	80	35	-45	30	-50	1	0	0	1	1	0	1	1	5	1	0	0	0	0	0	0	0	1	-4	1
96	No	0	YES	80	Female	YES	Married	live_alone	No_institutionalized	500-1000	6	No	Yes	No	Yes	Yes	No	Yes	No	Yes	III	YES	YES	24.01	85	100	15	90	5	1	0	0	0	1	0	1	1	4	1	0	0	1	1	1	1	1	6	2	1
142	No	0	YES	80	Man	NO	Single	live_alone	No_institutionalized	>=1500	5	No	Yes	No	No	No	No	No	No	No	III	NO	NO	23.99	65	70	5	70	5	1	0	0	0	0	0	1	1	3	1	0	0	0	0	0	1	1	3	0	1
169	No	0	NO	88	Female	YES	Single	live_alone	No_institutionalized	500-1000	6	No	Yes	No	No	No	No	Yes	No	No	III	NO	NO	23.56	65	60	-5	60	-5	1	0	0	0	0	0	1	1	3	1	0	0	0	0	0	1	1	3	0	1
103	No	0	YES	85	Female	NO	Single	live_alone	No_institutionalized	500-1000	8	No	Yes	Yes	No	No	No	No	No	No	III	YES	YES	23.53	90	95	5	90	0	1	1	1	1	1	1	1	0	7	1	1	0	0	0	0	1	1	4	-3	1
145	Yes	0	NO	90	Man	NO	Married	live_alone	No_institutionalized	1000-1500	4	No	Yes	Yes	No	No	No	No	No	No	III	NO	NO	23.51	20	15	-5	15	-5	1	0	0	0	0	0	0	1	2	1	0	0	0	0	0	0	1	2	0	1
93	No	0	NO	97	Man	YES	Single	nursing_home	Institutionalized	500-1000	8	No	Yes	No	No	No	No	Yes	No	Yes	III	NO	YES	23.51	35	45	10	45	10	0	0	0	0	0	0	0	0	0	0	0	0	0	0	0	0	0	0	0	0
53	No	0	NO	74	Female	NO	Married	live_as_a_couple	No_institutionalized	500-1000	7	No	Yes	No	No	Yes	No	No	No	No	II	NO	YES	23.44	70	85	15	85	15	1	0	0	0	0	1	0	1	3	1	0	1	1	1	1	1	1	7	4	1
69	No	0	NO	69	Man	NO	Single	live_alone	No_institutionalized	1000-1500	10	No	Yes	No	Yes	No	No	No	No	No	II	NO	NO	23.44	50	85	35	90	40	1	0	0	0	0	0	1	0	2	1	0	1	1	0	1	1	1	6	4	1
23	Yes	0	NO	81	Female	NO	Married	live_as_a_couple	No_institutionalized	>=1500	9	No	Yes	No	No	Yes	No	Yes	No	Yes	II	YES	YES	23.37	50	85	35	40	-10	1	0	0	0	0	0	0	1	2	1	0	1	1	1	1	1	1	7	5	1
134	No	0	YES	82	Female	NO	Single	live_with_relatives	No_institutionalized	500-1000	3	No	No	No	No	No	NO	Yes	No	No	III	NO	NO	23.23	65	70	5	70	5	1	0	0	1	0	0	1	1	4	1	0	0	1	0	0	1	1	4	0	1
25	No	0	NO	85	Female	NO	Married	live_as_a_couple	No_institutionalized	500-1000	7	No	No	No	No	No	No	Yes	No	No	IV	NO	NO	23.23	50	45	-5	45	-5	1	0	0	0	0	0	0	1	2	1	0	0	0	0	0	0	1	2	0	0
45	No	0	NO	86	Female	NO	Single	supervised_flat	Institutionalized	1000-1500	7	No	No	No	No	No	No	No	No	No	II	NO	YES	23.14	65	65	0	60	-5	1	0	0	0	1	0	1	1	4	1	0	0	0	0	0	0	0	1	-3	1
156	No	0	YES	85	Female	YES	Single	live_with_relatives	No_institutionalized	500-1000	2	No	Yes	No	No	No	No	Yes	No	Yes	III	YES	YES	23.11	20	20	0	20	0	0	0	0	0	0	0	0	0	0	0	0	0	0	0	0	0	0	0	0	0
168	No	0	NO	89	Female	NO	Single	live_alone	No_institutionalized	500-1000	4	No	Yes	No	No	No	No	Yes	No	No	II	NO	NO	22.96	70	65	-5	60	-10	1	0	0	0	0	0	1	1	3	1	0	0	0	0	0	1	1	3	0	1
199	No	0	YES	86	Female	NO	Single	live_with_relatives	No_institutionalized	500-1000	5	Yes	Yes	No	Yes	No	No	Yes	No	No	III	NO	YES	22.89	10	25	15	25	15	1	0	0	0	0	0	0	0	1	1	0	0	0	0	0	0	0	1	0	1
129	No	0	YES	79	Female	YES	Single	live_alone	No_institutionalized	500-1000	5	No	Yes	No	Yes	No	No	Yes	No	No	III	NO	NO	22.86	65	60	-5	70	5	1	0	0	0	1	0	1	0	3	1	0	0	0	1	0	1	0	3	0	1
19	No	0	NO	86	Female	NO	Single	live_alone	No_institutionalized	500-1000	14	No	Yes	Yes	No	No	No	No	No	Yes	III	NO	NO	22.83	80	95	15	100	20	1	0	0	1	1	0	0	1	4	1	0	1	1	1	1	1	1	7	3	1
28	No	0	NO	69	Man	NO	Married	live_as_a_couple	No_institutionalized	500-1000	5	Yes	No	Yes	Yes	No	No	No	Yes	Yes	II	NO	YES	22.66	50	60	10	55	5	1	0	0	0	0	0	1	0	2	1	0	0	0	0	0	0	1	2	0	1
159	No	0	NO	82	Female	NO	Married	live_as_a_couple	No_institutionalized	500-1000	5	No	Yes	Yes	Yes	No	No	No	No	Yes	III	NO	NO	22.58	45	50	5	50	5	1	0	0	0	0	0	1	1	3	1	0	0	0	0	0	1	1	3	0	1
126	No	0	YES	85	Female	YES	Single	live_alone	No_institutionalized	1000-1500	5	Yes	Yes	No	No	No	No	Yes	No	No	III	YES	YES	22.22	50	55	5	55	5	1	0	0	0	0	0	1	0	2	1	0	0	0	0	0	1	0	2	0	1
174	No	0	NO	87	Female	NO	Single	live_with_relatives	No_institutionalized	1000-1500	13	No	Yes	No	No	No	No	Yes	No	No	III	NO	NO	21.63	60	65	5	65	5	1	0	0	0	0	0	1	1	3	1	0	0	0	0	0	1	1	3	0	1
211	No	0	NO	92	Female	NO	Single	live_with_relatives	No_institutionalized	500-1000	8	No	Yes	No	Yes	No	No	Yes	No	Yes	III	NO	YES	21.36	40	45	5	45	5	1	0	0	0	0	0	0	0	1	0	0	0	0	0	0	0	0	0	-1	0
37	No	0	NO	91	Female	YES	Single	supervised_flat	Institutionalized	500-1000	4	Yes	Yes	Yes	Yes	No	No	No	No	Yes	III	YES	NO	21.36	25	40	15	45	20	0	0	0	0	0	0	0	0	0	0	0	0	0	0	0	0	0	0	0	0
207	Yes	0	YES	92	Female	NO	Single	nursing_home	Institutionalized	500-1000	11	No	Yes	No	Yes	No	No	Yes	No	Yes	III	NO	YES	20.81	60	55	-5	55	-5	1	0	0	0	0	0	0	0	1	1	0	0	0	0	0	0	0	1	0	1
194	No	0	YES	90	Female	NO	Single	nursing_home	Institutionalized	500-1000	6	No	Yes	Yes	No	No	No	No	No	Yes	II	YES	YES	20.78	5	5	0	5	0	0	0	0	0	0	0	0	0	0	0	0	0	0	0	0	0	0	0	0	0
146	Yes	0	YES	89	Female	NO	Single	supervised_flat	Institutionalized	500-1000	10	No	No	No	No	No	No	No	No	Yes	III	YES	YES	20.31	55	60	5	60	5	1	0	0	0	1	0	0	0	2	1	0	0	0	1	0	0	0	2	0	1
144	No	0	NO	79	Female	NO	Single	live_alone	No_institutionalized	500-1000	4	No	No	No	No	No	No	No	No	Yes	II	NO	NO	20	50	55	5	60	10	1	0	0	0	0	0	1	0	2	1	0	0	0	0	0	1	0	2	0	1
177	Yes	0	NO	95	Female	YES	Single	nursing_home	Institutionalized	1000-1500	9	No	Yes	No	Yes	Yes	No	Yes	No	Yes	IV	NO	NO	20	15	15	0	15	0	1	0	0	0	0	0	0	0	1	1	0	0	0	0	0	0	0	1	0	1
121	Yes	0	NO	89	Female	YES	Single	live_alone	No_institutionalized	500-1000	6	No	Yes	No	No	No	No	No	No	Yes	II	NO	YES	19.53	40	50	10	50	10	1	0	0	0	1	0	1	0	3	1	0	0	0	0	0	1	0	2	-1	1
41	No	0	NO	80	Female	NO	Single	live_alone	No_institutionalized	500-1000	7	No	Yes	No	Yes	No	No	No	No	No	II	NO	YES	19.14	50	90	40	90	40	1	0	0	0	0	0	1	1	3	1	0	0	0	0	0	1	1	3	0	1
59	No	0	NO	81	Female	NO	Single	live_with_relatives	No_institutionalized	500-1000	9	No	Yes	No	No	Yes	No	Yes	No	Yes	II	YES	YES	19.14	55	55	0	55	0	1	0	0	0	0	0	0	1	2	1	0	0	0	0	0	0	0	1	-1	1
106	No	0	YES	79	Female	YES	Single	live_alone	No_institutionalized	500-1000	5	No	No	No	No	No	No	No	No	No	I	NO	NO	18.82	85	80	-5	80	-5	1	0	0	1	1	0	1	1	5	1	0	0	1	1	0	1	1	5	0	1
197	No	0	NO	91	Man	NO	Single	live_alone	No_institutionalized	>=1500	4	No	Yes	Yes	No	No	Yes	No	No	Yes	III	NO	YES	18.73	35	35	0	35	0	1	0	0	0	0	0	0	1	2	1	0	0	0	0	0	0	1	2	0	1
152	No	0	YES	97	Female	NO	Single	nursing_home	Institutionalized	500-1000	3	No	Yes	No	No	No	No	No	No	Yes	II	NO	YES	18.36	35	45	10	50	15	1	0	0	0	0	0	0	1	2	1	0	0	0	0	0	0	1	2	0	1
77	No	0	NO	96	Female	NO	Single	live_with_relatives	No_institutionalized	500-1000	7	Yes	Yes	No	No	No	Yes	Yes	No	Yes	II	NO	NO	16.8	50	45	-5	45	-5	1	0	0	0	0	0	0	0	1	0	0	0	0	0	0	0	0	0	-1	0
[truncated: 9 more columns]
